# Supplementary material
Source: PubMed Central journal article supplement (PMC8424526)
Supplement: jamapediatr-e212782-s001.pdf [file jamapediatr-e212782-s001.pdf]

## INVESTIGATOR STUDY PLAN - REQUIRED

1  
2  
3  
4  
5  
6  
7  
8  
9  
10  
11  
12  
13  
14  
15  
16  
17  
18  
19  
20  
21  
22  
23  
24  
25  
26  
27  
28  
29  
30  
31  
32  
33  
34  
35  
36  
37  
38  
39  
40  
41  
42  
43  
44  
45  
46

### 1. TITLE

The Effect of Screen Time on Recovery from Concussion

### 2. EXTERNAL IRB REVIEW HISTORY\*

None

### 3. PRIOR APPROVALS:

Prior Approvals: We have secured approvals from the Emergency and Pediatrics Department at UMASS.

Conflict of Interest (COI): None of the study Investigators have a COI with this research.

#### *Clinical Engineering Department:*

N/A

#### *Biohazardous Agents:*

N/A

#### *Radiation:*

N/A

### 4. OBJECTIVES\*

This study seeks to prospectively examine the effect of screen time on the duration of post-concussive symptoms. We hypothesize allowing screen time as tolerated in the first 48 hours of recovery will cause the symptoms to be prolonged.

### 5. BACKGROUND\*

There are 2.8 million emergency department (ED) visits annually for traumatic brain injury in the United States.<sup>1</sup> The 2016 Consensus Statement of the 5th International Conference on Concussion in Sport favors a period of 24 to 48 hours of cognitive and physical rest in the acute phase of concussion recovery; however, there is no specific recommendation for the use of screen time during this period.<sup>2</sup> The ability to watch television, use phones, and play video games is a very common question of parents and patients. There is a dearth of teenage-acceptable substitute activities that maintain rest – listening to music, coloring, books on tape? Some clinicians favor screen time, saying it is a form of cognitive rest and one of the few options for a pediatric concussion sufferers to occupy themselves during the initial period of inactivity. Others strongly caution against the use of screen time arguing it is excessive visual

## INVESTIGATOR STUDY PLAN - REQUIRED

47 stimulation and cognitive effort. Some doctors offer recommendations on specific types and  
48 durations of screen time, for example allowing television but not video games, or limiting  
49 communications to a certain number of text messages daily.<sup>3,4</sup> To the best of our knowledge,  
50 there are no randomized controlled trials looking at the specific effect of screen time on  
51 concussive symptoms.

52  
53 This study will prospectively examine the effect of screen time on recovery from  
54 concussion. Patients 12 to 25 years of age presenting to the ED with a concussion will be  
55 randomized to allow for screen time as tolerated or to abstain from screen time for the first 48  
56 hours of recovery. The amount of screen time use and duration of concussive symptoms will be  
57 assessed through daily surveys.

### 58 59 **6. INCLUSION AND EXCLUSION CRITERIA\***

60  
61 **Inclusion Criteria:** We will include individuals, including pregnant women, who are presenting  
62 to the emergency department with a traumatic head injury sustained in the last 24 hours that have  
63 a concussion as defined by as defined by the Acute Concussion Evaluation tool (ACE-ED)<sup>5</sup> and  
64 are:

- 65 A) Between 12 and 25.99 years of age
- 66 B) English-speaking
- 67 C) Subject (and parent/guardian when applicable) is able and willing to provide
- 68 informed consent and assent

69  
70 **Exclusion Criteria:** We will exclude individuals who have a Glasgow Coma Scale score of 13  
71 or less; have brain abnormalities on imaging; have severe preexisting neurological conditions;  
72 have significant developmental delay; are intoxicated; or require neurosurgical intervention,  
73 intubation, or hospital admission as well as individuals who:

- 74 A) Do not meet the age criteria;
- 75 B) Are non-English speaking;
- 76 C) Are prisoners;
- 77 D) Are unable or unwilling to provide informed consent;
- 78 E) Are under the age of 18 and do not have a parent/guardian with them who is willing
- 79 and able to consent.

### 80 81 82 **7. STUDY-WIDE NUMBER OF SUBJECTS\***

83 N/A

### 84 85 **8. STUDY-WIDE RECRUITMENT METHODS\***

86 N/A

### 87 88 **9. STUDY TIMELINES\***

89 Participants will be part of this study for the time it takes to consent and complete questionnaires  
90 at enrollment, daily surveys for 10 days, and a survey 30 days and 6 months post-enrollment  
91 (approximately 60 to 100 minutes in total).

92

## INVESTIGATOR STUDY PLAN - REQUIRED

93 We anticipate it will take 18-24 months to enroll all study subjects. This study should be  
94 completed by September 2020.

95  
96  
97

### 98 **10. STUDY ENDPOINTS\***

99 Volunteers' participation in the study ends after completing the email or paper survey 6 months  
100 post-discharge.

101  
102 The primary outcome measure is the duration of concussive symptoms. Secondary outcomes  
103 include the number and severity of specific symptoms each day, amount of screen time use, days  
104 until return to school/work and sports, effect of specific types of screen time (i.e. video games)  
105 on concussive symptoms and duration.

106  
107  
108

### 109 **11. PROCEDURES INVOLVED\***

110  
111

**Recruitment:** See Section 24

112  
113 **Consent:** See Section 30

114  
115

**Main Intervention:**

116  
117 Following consent in the emergency department, subjects or parents will be asked to complete a  
118 questionnaire of demographic information (Appendix A) and the ACE-ED (Appendix B). The  
119 study staff who enrolls the participant will either enter the participant's answers directly in  
120 REDCap or on paper. When handwritten, these responses will be stored in a locked box in the  
121 emergency department until study personnel enter it into REDCap. The patient will be  
122 randomized to either allow for screen time as tolerated for the first 48 hours or abstain from  
123 screen time for 48 hours. The patient will be randomized upon opening a sealed envelope, which  
124 contains the subject's study number and study group. Subjects will be discharged with a paper  
125 log book to help keep track of screen time, schoolwork/work, and exercise over the next 48 hours  
126 (Appendix C). Study staff will write the corresponding dates on the log book at enrollment.  
127 Study Participants will also receive standard ACE-ED discharge instructions modified with the  
128 study group-specific recommendations regarding screen time (Appendix D).

129  
130  
131

Subjects with the help of parents if applicable will be asked to complete daily surveys for 10  
days.

132  
133

Day 1 to 3 post-discharge: Screen time Survey (Appendix E) and PCSS (Appendix G)

134  
135  
136

Day 4 to 10 post-discharge: Activity survey (Appendix F) and PCSS (Appendix G)

137 Subjects will then be sent a PCSS and survey at day 30 (Appendix H) and 6 months (Appendix I)  
138 after enrollment.

## INVESTIGATOR STUDY PLAN - REQUIRED

139

140

141 We will conduct an initial feasibility study comparing two methods for daily surveys – daily  
142 email surveys and a pre-addressed paper packet. The questions for each method are identical.  
143 We will recruit ten patients to trial each method and random assign 5 to each study group within  
144 each survey method. Based on the success of these two methods, we will either choose the  
145 superior method or retain both as an option for subjects in the larger study.

146

147 For the email surveys, we will use the REDCap Database in “Survey” mode to track recruitment  
148 and collect all relevant data. The email address field in REDCap will automatically generate 10  
149 days of daily surveys (Appendix E, F, and G), a 30 day survey (Appendix H), and 6 month  
150 survey (Appendix I). If a subject has not returned a survey for the previous three consecutive  
151 days, they will be removed from the email list. To avoid being intrusive, no more than 2  
152 reminder emails will be sent daily during the study period. Subjects and/or guardians will be  
153 emailed a REDCap survey at 8 a.m. Subjects who have not yet completed the daily survey will  
154 get an email and/or phone call reminder to complete the survey between 2pm and 8pm.

155

156 For the paper surveys, the subject is given a packet with the surveys (Appendices E, F, G)  
157 printed out for 10 days stapled together with the study ID number at the top of each page. The  
158 study staff enrolling the patient will write the corresponding dates for surveys on the packet. The  
159 subject will be asked to complete the daily surveys and mail back the packet after day ten. The  
160 subject will be sent the 30 day and 6 month follow up surveys. Subjects will be provided with  
161 stamped self-addressed envelopes for all surveys to the PIs office at UMASS Memorial,  
162 University Campus. The PI will input the data to REDCap and destroy the original documents.  
163 With subjects’ permission, they will receive up to 4 follow up phone calls from study staff  
164 during the study period to promote retention, answer questions, and offer replacement packets by  
165 email if data is lost within first two days of study enrollment.

166

167 We wish to send 30 day and 6 month surveys to subjects already enrolled in the study. The  
168 survey will be sent by email through REDCap or USPS mail in the same fashion as the daily  
169 surveys were to participants. If subjects have not completed the survey within 2 days, they will  
170 be sent a reminder email. Subjects will not be contacted beyond the two potential emails for  
171 each survey.

172

173 Subjects enrolled in the study following this amendment will be notified at enrollment of a 30  
174 day and 6 month follow up survey.

175

176

177

178 **12. DATA AND SPECIMEN BANKING\***

179 N/A

180

181 **13. Data Analysis and Management\***

182

183 **Sample Size and Power Calculation**

## INVESTIGATOR STUDY PLAN - REQUIRED

184 Our primary outcome is post-concussive symptoms, which are measured by the PCSS scale.  
185 Based on previous research<sup>6</sup>, we hypothesize that our intervention will improve patients' score  
186 by 12 points in total PCSS (equivalent to a moderate effect size, based on an estimated SD of  
187 22). Using G-Power program (means procedure) with  $\alpha=0.05$  (two-sided), power  $(1-\beta)=0.80$ , the  
188 calculated sample size is 106 (53 for each study group).  
189

### 190 Data Analysis Plan

191 The outcome variable is the duration of concussion symptoms. The main predictor variable is  
192 screen time-allowed versus screen time-abstinent instructions. For univariate modeling, we will  
193 use Kaplan-Meier analysis with log-rank tests of significance to evaluate the effect of screen  
194 time on time to symptom resolution. To evaluate the effect of other potential predictor variables  
195 on symptom duration, we will construct a multivariate Cox proportional hazard model that  
196 includes cognitive activity, exercise, age, gender, number of previous concussions, history of  
197 prolonged concussion, total initial PCSS score, amnesia at time of injury, and loss of  
198 consciousness at time of injury. To further assess for the potential effect of age, we will  
199 independently perform these analyses separately for 2 separate age categories: pediatric (12–18  
200 years) and adult (18–25 years).  
201  
202

### 203 **14. PROVISIONS TO MONITOR THE DATA TO ENSURE THE SAFETY OF SUBJECTS\***

204 This is a minimal risk study. Any unanticipated adverse events will be reported in accordance  
205 with **HRP-801 INVESTIGATOR GUIDANCE: Prompt Reporting Requirements**.  
206

207 Data will be analyzed by the primary investigator after the first 50, 100, 150 and 200 enrolled  
208 subjects. The study will be terminated if either group demonstrates a significant difference in  
209 duration of symptoms as defined by a significant ( $p < 0.05$ ) Mann-Whitney U Test comparison  
210 of a median time difference greater than 2 days until concussion recovery ( $PCSS \leq 7$ ).<sup>6</sup>  
211  
212

### 214 **15. WITHDRAWAL OF SUBJECTS WITHOUT THEIR CONSENT\***

215 N/A  
216  
217

### 218 **16. RISKS TO SUBJECTS\***

219 We do not foresee any serious risks for the subjects. There is a risk that utilizing or not utilizing  
220 screen time during the acute phase of recovery from concussion may have an effect of the  
221 duration or the magnitude of post-concussive symptoms. There is no data on how screen time  
222 alone affects recovery from concussion, so we are unsure which group, if any, will have worse or  
223 more prolonged symptoms. We anticipate the effect, if present, will be minimally intrusive as  
224 the majority of concussions resolve in less than 10 days.<sup>6</sup>  
225

226 There is a risk that the screen time abstinent group may fall behind in emails, conversation with  
227 peers, and completion of work (which is cautioned against in concussion recovery). This may  
228 lead to a greater feeling of social isolation or stress.  
229

## INVESTIGATOR STUDY PLAN - REQUIRED

230 Although we will take caution to ensure data security and protect PHI, there is always a risk of a  
231 data breach. Only registered study personnel will have access to the REDCap database.  
232 For the email surveys, subjects and parents will be entering the data into REDCap from their  
233 home computer or mobile phone, which may be an unsecured network or device. For the paper  
234 surveys, the study ID# and survey responses will be travelling through USPS mail and has a  
235 minimal risk of being misplaced. No identifiers except study ID will be on the paper surveys.  
236 Sensitive information that could be obtained if REDCap data was hacked includes names, dates  
237 of birth, phone numbers, email address, and medical history. We will attempt to minimize this  
238 risk by only entering data into REDCap and keeping study identifiers separate from deidentified  
239 data within REDCap.

240  
241  
242  
243  
244  
245  
246

### 247 **17. POTENTIAL DIRECT BENEFITS TO SUBJECTS\***

248 Subjects will be given thorough discharge instructions with up-to-date treatment  
249 recommendations for concussion. The act of keeping a log and answering survey questions will  
250 assist subjects in evaluating their own concussion symptoms and compliance with prescribed  
251 cognitive and physical rest, which may help them guide their own recovery with the assistance of  
252 their primary care physician.

253  
254  
255  
256  
257

Subjects will be given a \$20 gift card if they complete the majority of the initial 10 days of  
online surveys.

### 258 **18. VULNERABLE POPULATIONS\***

259 **Children:** This research is minimal risk and will involve children between 12 and 17.  
260 Permission will be obtained by one or both parents or guardians depending on who is present in  
261 the emergency department at the time of consent. If one parent does not wish for the child to  
262 participate, the child will not be enrolled. No other persons except the parent or legal guardian  
263 may consent the subject. Patients in state custody will not be offered participation.

264  
265  
266  
267  
268  
269

All participants in this study under 18-years-old will be asked for signed assent and the study  
will be explained in age-appropriate terms (see Appendix H). Any child who does not wish to  
participate or demonstrates signs of unwillingness to participate as perceived by the  
parent/guardian or enrollment personnel will not be enrolled.

270 **Pregnant Women:** Pregnancy status will not be specifically asked as part of this research.  
271 Therefore, pregnant women may be included in the study unless criteria are not met or they  
272 choose not to participate. Inclusion does not pose any known additional risks to pregnant  
273 participants or fetuses. We will not be providing guidance or advice regarding pregnancy  
274 management.

275

## INVESTIGATOR STUDY PLAN - REQUIRED

276                   ○ .

277

### 278 **19. MULTI-SITE RESEARCH\***

279 N/A

280

281

282

### 283 **20. COMMUNITY-BASED PARTICIPATORY RESEARCH\***

284 N/A

285

### 286 **21. SHARING OF RESEARCH RESULTS WITH SUBJECTS\***

287 We will not be sharing research results with study participants.

288

### 289 **22. SETTING**

290 This study will take place in the pediatric and adult emergency departments at the UMASS

291 Memorial-University Campus and the emergency department at the UMASS Memorial-

292 Memorial Campus.

293

294

295

### 296 **23. RESOURCES AVAILABLE:**

#### 297 **Resources Available:**

298

299 **The Emergency Medicine Research Division:** This division supports research activities  
300 in a diverse array of basic science and clinical topics. Monthly meetings are scheduled for  
301 the core department Investigators to review ongoing protocols and to advise and support  
302 younger faculty.

303

#### 304 **Study Staff:**

305

306 All members are up-to-date on CITI certification and are aware that this training must be  
307 renewed every three years. They will conduct this research in accordance with the most  
308 up-to-date IRB-approved protocol.

309

310 Prior Study Staff training and experience will allow for accurate interpretation of medical  
311 records and data abstraction.

312

313 The PI will hold conferences for the emergency and pediatrics department to review  
314 current concussion guidelines and offer recommendations for standard discharge  
315 instructions in keeping with the 2016 Consensus in Sport guidelines. The PI will review  
316 the study protocol and enrollment process.

317

318 **Principle Investigator (PI):** The PI is a pediatric emergency physician, boarded in  
319 pediatrics with a subspecialty board in pediatric emergency medicine. He has served as  
320 principal investigator on three prior studies at other institutions, two retrospective and  
321 one prospective. The last study was a prospective study of carbon monoxide exposure in

## INVESTIGATOR STUDY PLAN - REQUIRED

ice hockey players, which took place in the community under oversight and approval of the Boston Children’s Hospital IRB. He will be responsible for personally conducting and supervising all aspects of the study including, but not limited to: design, execution, recruitment, retention, results analysis, preparation of a manuscript(s) and monitoring Research Assistants/Coordinators. He will ensure all Study Staff are provided with the most up-to-date research protocol, train all Study Staff to perform the necessary tasks, and monitor their progress to ensure they are following said protocol. He will also be responsible for regulatory requirements and will be available at all times to assist Staff with any questions or concerns they may have

**Co-Investigators (Co-Is):** The Co-Is will be current UMASS attending physicians, resident physicians, or medical students. The Co-Is will assist the PI with all aspects of the study including, but not limited to: design, execution, recruitment, subject retention, results analysis, preparation of a manuscript(s) and monitoring Research Assistants/Coordinators.

**Research Assistants (RAs):** The RAs will have basic training in research methods and human subjects research, as well as at least a bachelor’s degree in a human science field or equivalent. They will be trained by the PI to complete all aspects of the study including, but not limited to: recruitment, retention, follow-up and data handling.

**Research Coordinators (RCs):** In addition to the responsibilities described for RAs, the RCs will assist with regulatory requirements and communications with the IRB.

**Statistician:** Will assist in sample size calculation, survey design, data analysis, and data presentation.

### 24. LOCAL RECRUITMENT METHODS

#### **Feasibility**

A Pulsecheck inquiry yielded about 350 patients aged 12 to 25 annually diagnosed with concussion in the ED in 2015 and 2016. As we anticipate needing about 120 subjects (see **Section 13**) but anticipate a significant loss to follow up rate, we believe the necessary sample size can be achieved within one to two years.

#### **Recruitment Procedures:**

Potential participants presenting to the emergency department with head injury will be identified by an investigator, research assistant, or clinical staff. Study Staff will query the ED tracking system (EPIC) to identify eligible participants. We also hope to create a “Best-Practice Advisory” for EPIC to help practitioners remember to recruit patients.

Study Staff will obtain the potential participant’s name, ED bed location, and treating physician’s name from the tracking system. With permission from the attending physician, the patient will be approached about study participation. Once deemed potentially eligible from age and chief complaint, the potential participant will be given a Study ID#.



## INVESTIGATOR STUDY PLAN - REQUIRED

368  
369 After the potential participant has been evaluated, treated, and deemed medically stable, with  
370 permission of the attending physician, a member of the Study Staff will approach them regarding  
371 this research. At that point the potential participant will be given a study ID#. The Study Staff  
372 member will ask for the individual's (and, if applicable, guardian's) permission to explain our  
373 study and then will be offered the opportunity to participate. Identifying information (Appendix  
374 A) and the results of the administered survey (Appendix B) in the emergency department will be  
375 entered directly into REDCap, if available to the enroller, and, if not, on paper to be placed in a  
376 locked box in the emergency department until Study Staff can enter the data into REDCap.

### 377 **Destruction of Identifiers:**

379 For individuals who turn out to be ineligible based on exclusion criteria (see **Section 6**) or not  
380 meeting the definition of concussion on ACE-ED (Appendix B) or those who decline to  
381 participate, identifiers will be deleted from REDCap and/or the paper copies will be shredded  
382 within 48-hours of discharge from the ED.  
383

384 For individuals who consent to the study, identifiers will be linked to study survey results for a  
385 limited period of time. Appendix A will serve as the master code and patient identifiers can only  
386 be accessed on Red Cap by approved Study Staff. If the patient was initially enrolled on paper,  
387 the paper will be shredded upon entry of Appendix A into REDCap within 48 hours of ED  
388 discharge. Identifiers will be deleted following the participant's completion in the study 10 days  
389 post-discharge.  
390

### 391 392 393 **Compensation:**

394  
395 Study participants will be compensated for their time with gift cards for a total value of \$20. The  
396 gift cards will be distributed through an emailed weblink following completion of the day 10  
397 email survey or receipt of the survey packet by mail. If a participant is completing paper surveys  
398 and does not have an email address, the gift card will be mailed.  
399

400  
401

### 402 403 **25. LOCAL NUMBER OF SUBJECTS**

404 We anticipate screening 300 subjects, enrolling 200 and retaining 120.  
405

### 406 407 **26. CONFIDENTIALITY**

#### 408 409 **Procedures to Secure the Data:**

410  
411 **Coding:** Upon identification for possible enrollment, potential participants will be given a  
412 Study ID#. When possible, participants will be entered directly into REDCap at recruitment by a  
413 member of the Study Staff on an institution-issued tablet computer or computer-on-wheels. If

## INVESTIGATOR STUDY PLAN - REQUIRED

414 necessary, Appendix A and B will be completed on paper. Following completion on paper, they  
415 will be placed into a locked box in the emergency department accessible only to Study Staff.  
416 When the paper forms have been entered into REDCap, they will be shredded and disposed of  
417 through the hospital HIPAA disposal system. Appendix A will serve as the master code linking  
418 patient identifiers with the Study ID#. It can only be accessed only on Red Cap by approved  
419 Study Staff. Appendix B-G will be marked with the participant's Study ID# only and can only  
420 be accessed through REDCap by study personnel.

421  
422 **Access:** Only members of the Study Staff (PI, Co-I, RA, RCs) will have access to the  
423 Red Cap study data.

424  
425 **Storage:** As mentioned in *Section 24*, we will be using REDCap to track recruitment and  
426 collect all relevant data. REDCap requires Study staff to log in using their credentials and  
427 password. Upon completion of data collection, de-identified survey responses will be exported  
428 to a statistical software package (SPSS or STATA). These spreadsheets will be stored on secure,  
429 password protected UMass Memorial servers which also require authorized Study Staff to log in  
430 using their credentials and password.

431  
432 Paper surveys will be stored in a locked box in the emergency department until  
433 they are entered into RedCap, at which point they will be destroyed.

434  
435 **Destruction:** As mentioned in *Section 24*, individuals ineligible or unwilling to  
436 participate in the study will be deleted from REDCap and if relevant the paper copies, stored in a  
437 locked box will be shredded within 48-hours of discharge from the ED.

438  
439 For individuals who consent to the study, identifiers will only be linked to study survey results  
440 through Appendix A for a limited period of time. Identifiers will be deleted from Red Cap within  
441 24 hours following the participant's completion of the study 6 months post-discharge.  
442 Completed surveys (Appendix B-G) will be linked by Study #s only. In accordance with **HRP-**  
443 **800**, completed surveys will be stored for 3 years following completion of this research.

444  
445

### 446 **27. PROVISIONS TO PROTECT THE PRIVACY INTERESTS OF SUBJECTS**

447

448 We will use a HIPAA waiver of authorization to identify potential participants.

449

450 Individuals will be informed that their participation is voluntary and refusal or withdraw of  
451 participation will not involve any penalty or loss of benefits to which they are otherwise entitled.  
452 The consent process and initial surveys will be conducted in a private location (typically the ED  
453 room of the patient). Participants will be informed that they can skip any survey questions that  
454 they feel uncomfortable answering.

455

456 Following consent, a signed HIPAA Authorization will be obtained to access and record  
457 information from the participant's EMR. This information will be limited to information directly  
458 related to the study.

459

## INVESTIGATOR STUDY PLAN - REQUIRED

460  
461  
462  
463  
464  
465  
466  
467  
468  
469  
470  
471  
472  
473  
474  
475  
476  
477  
478  
479  
480  
481  
482  
483  
484  
485  
486  
487  
488  
489  
490  
491  
492  
493  
494  
495  
496  
497  
498  
499  
500  
501  
502  
503  
504  
505

### **28. COMPENSATION FOR RESEARCH-RELATED INJURY**

N/A

### **29. ECONOMIC BURDEN TO SUBJECTS**

There will be no economic burden to participants due to participation in this study.

### **30. CONSENT PROCESS**

Once permission has been obtained from the potential participant's treating attending physician, he or she will be approached by a member of the Study Staff regarding consent. Only Study Staff with prior approval who have reviewed **HRP-802 Informed Consent** and **HRP-021 POLICY: Legally Authorized Representatives, Children, and Guardians** will be obtaining consent.

A member of the study team will obtain consent for all patients and assent from all minors. This process will occur in a room that is private away from other patients or people. All patients under the age of 18 will require assent and parent or guardian consent. Because the study is survey-based and is minimal risk, consent will only need to be obtained from one parent/guardian. Children aged 12-17, will be given an assent form to sign, and the study will be described to them in easy to understand terms. **HRP-021 POLICY: Legally Authorized Representatives, Children, and Guardians** determines which individuals in the state meet the definition of "children."

All of the potential risks, reasoning, and goals of this research will be explained to each individual prior to obtaining consent and assent when applicable. They will be informed that enrollment is voluntary and declining to participate will not affect their treatment. Ample time will be given to answer any questions and they will be informed that they may opt out of this voluntary study at any point. If there are signs of unwillingness or a child chooses not to provide assent, he or she will not be included in the study. Participants will be offered copies of all **Signed Forms** and given Study Staff contact information (**Appendix I**). They will also be informed that they can skip any survey questions that they feel uncomfortable answering.

### **31. PROCESS TO DOCUMENT CONSENT IN WRITING**

We will be obtaining informed, written consent for this study. Study Staff will have participants sign the **Consent** document and **Assent** document (when applicable) according to **HRP-803 Documentation of Informed Consent** and the **HRP-021 POLICY: Legally Authorized Representatives, Children, and Guardians**

## INVESTIGATOR STUDY PLAN - REQUIRED

506  
507  
508  
509  
510  
511  
512  
513  
514  
515  
516  
517  
518  
519  
520  
521  
522  
523  
524  
525  
526  
527  
528  
529  
530  
531  
532  
533  
534  
535

### 32. DRUGS OR DEVICES

N/A

1. Taylor CA, Bell JM, Breiding MJ, Xu L. Traumatic Brain Injury–Related Emergency Department Visits, Hospitalizations, and Deaths — United States, 2007 and 2013. *MMWR Surveill Summ.* 2017;66(9):1-16. doi:10.15585/mmwr.ss6609a1.
2. McCrory P, Meeuwisse W, Dvorak J, et al. Consensus statement on concussion in sport—the 5<sup>th</sup> international conference on concussion in sport held in Berlin, October 2016. *Br J Sports Med.* 2017;(October 2016):bjsports-2017-097699. doi:10.1136/bjsports-2017-097699.
3. Brown NJ, Mannix RC, O’Brien MJ, Gostine D, Collins MW, Meehan WP. Effect of Cognitive Activity Level on Duration of Post-Concussion Symptoms. *Pediatrics.* 2014;133(2):e299-e304. doi:10.1542/peds.2013-2125.
4. Halstead ME, McAvoy K, Devore CD, Carl R, Lee M, Logan K. Returning to Learning Following a Concussion. *Pediatrics.* 2013;132(5):948-957. doi:10.1542/peds.2013-2867.
5. Zuckerbraun NS, Atabaki S, Collins MW, Thomas D, Gioia GA. Use of Modified Acute Concussion Evaluation Tools in the Emergency Department. *Pediatrics.* 2014;133(4):635-642. doi:10.1542/peds.2013-2600.
6. Thomas DG, Apps JN, Hoffmann RG, McCrea M, Hammeke T. Benefits of Strict Rest After Acute Concussion: A Randomized Controlled Trial. *Pediatrics.* 2015;135(2):213-223. doi:10.1542/peds.2014-0966.
