# Supplementary material
Source: PubMed Central journal article supplement (PMC8424526)
Supplement: jamapediatr-e212782-s002.pdf [file jamapediatr-e212782-s002.pdf]

## Supplementary Online Content

Macnow T, Curran T, Tolliday C, et al. Effect of screen time on recovery from concussion: a randomized clinical trial. *JAMA Pediatr*. Published online September 7, 2021.  
doi:10.1001/jamapediatrics.2021.2782

**eTable.** Comparison of Screen Time Activity Between Screen Time Abstinent and Screen Time Permitted Groups in First 3 Calendar Days After Concussion

**eFigure.** Kaplan-Meier Survival Curves Comparing Days Until Concussion Recovery Between Screen Time Abstinent and Screen Time Permitted Groups at 4 Different Post-Concussive Symptom Scale (PCSS) Cutoff Scores

This supplementary material has been provided by the authors to give readers additional information about their work.

**eTable.** Comparison of Screen Time Activity Between Screen Time Abstinent and Screen Time Permitted Groups in First 3 Calendar Days After Concussion

| <b>Activity</b>                               | <b>Screen time permitted<br/>(n=40)</b> | <b>Screen time abstinent<br/>(n=40)</b> |
|-----------------------------------------------|-----------------------------------------|-----------------------------------------|
| Total Minutes of Screen Time,<br>Median (IQR) | 630 (415, 995)                          | 130 (61, 275)                           |
| Television                                    | 212.5 (120, 405)                        | 15 (0,60)                               |
| Phone                                         | 260 (70,422.5)                          | 55 (16,105)                             |
| Video games                                   | 35 (0,205)                              | 3 (0,47.5)                              |
| Computer/Tablet                               | 10.5 (0,62.5)                           | 0 (0,11)                                |

**eFigure.** Kaplan-Meier Survival Curves Comparing Days Until Concussion Recovery Between Screen Time Abstinent and Screen Time Permitted Groups at 4 Different Post-Concussive Symptom Scale (PCSS) Cutoff Scores

A. PCSS Cutoff  $\leq 1$

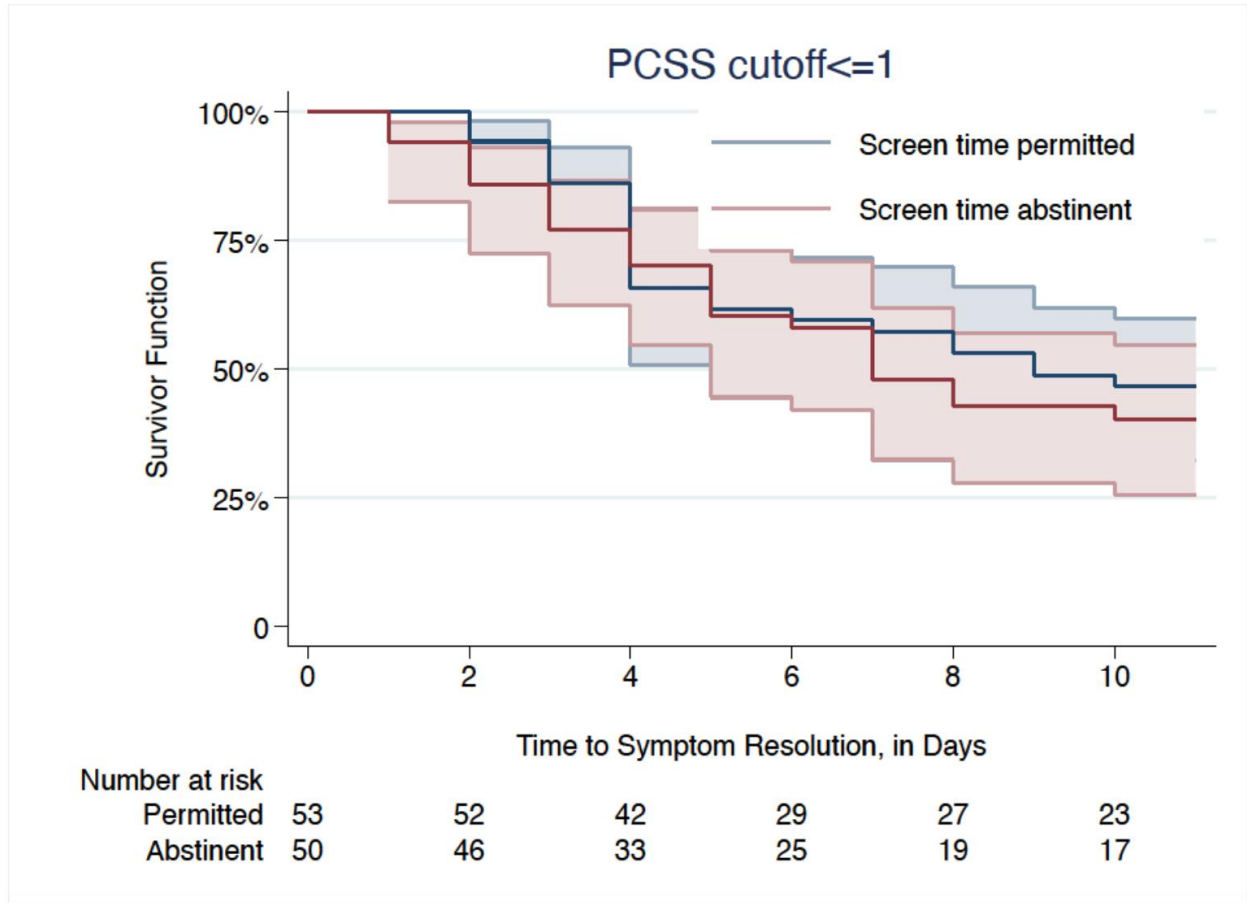

Shadows represent 95% CIs.

B. PCSS Cutoff  $\leq 3$

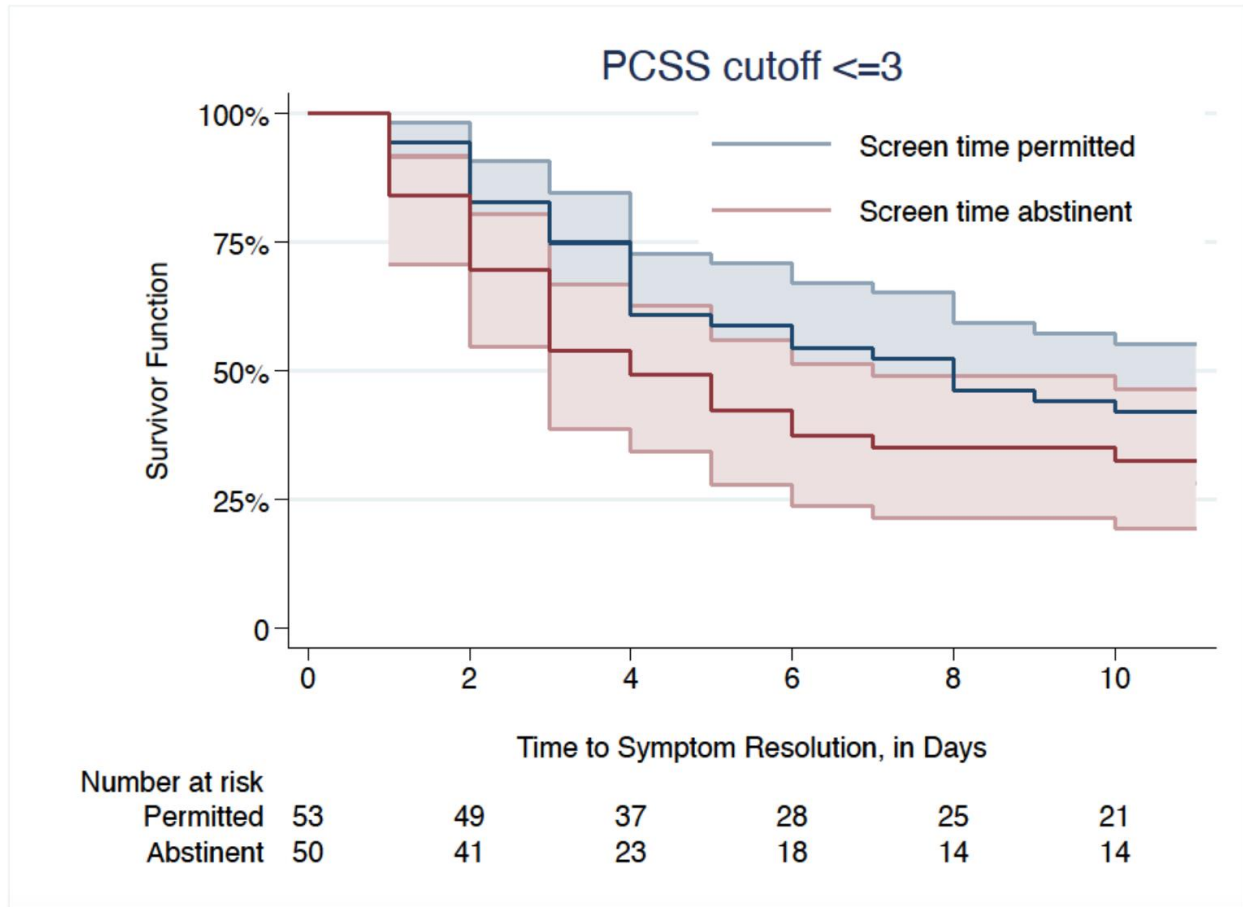

Shadows represent 95% CIs.

C. PCSS Cutoff  $\leq 6$

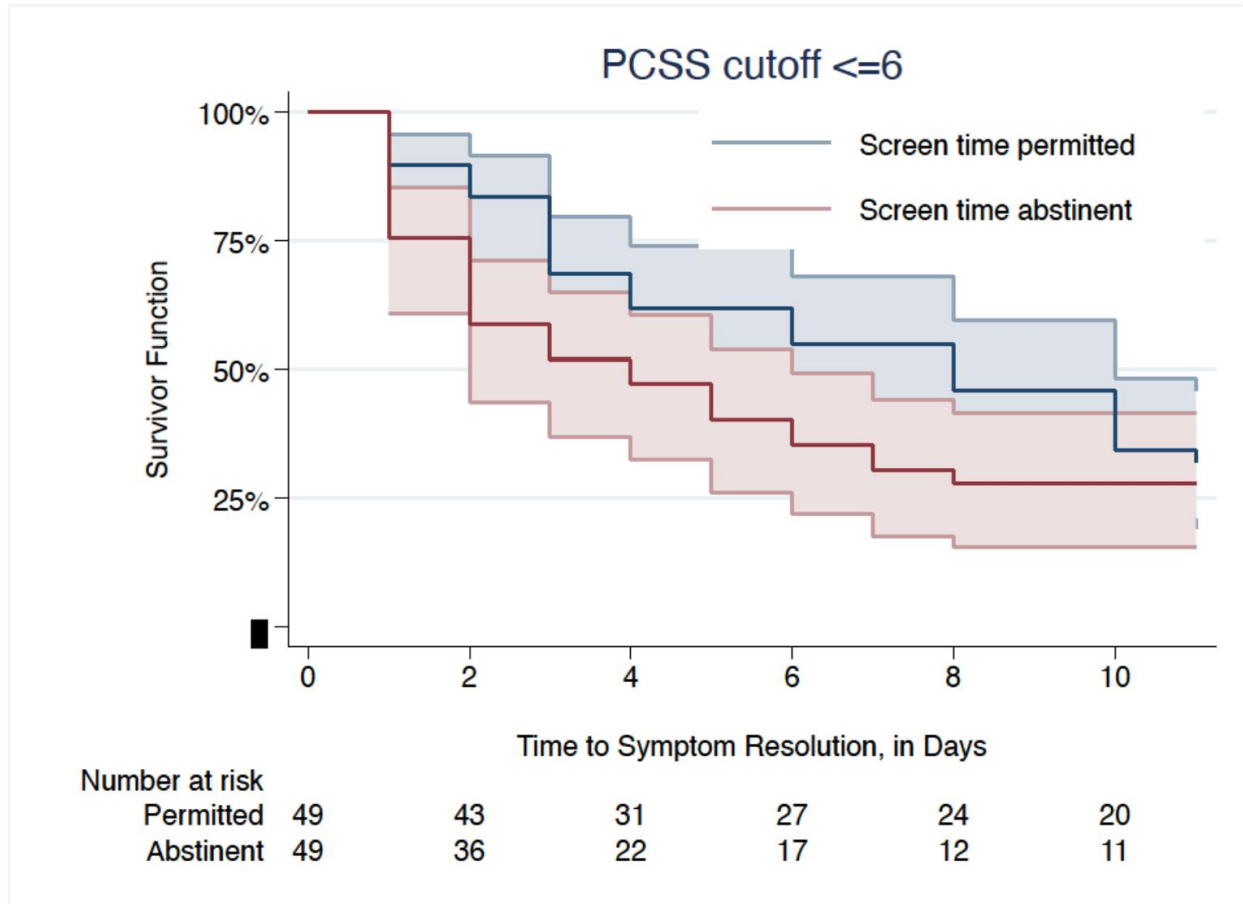

Shadows represent 95% CIs.

D. PCSS Cutoff  $\leq 7$

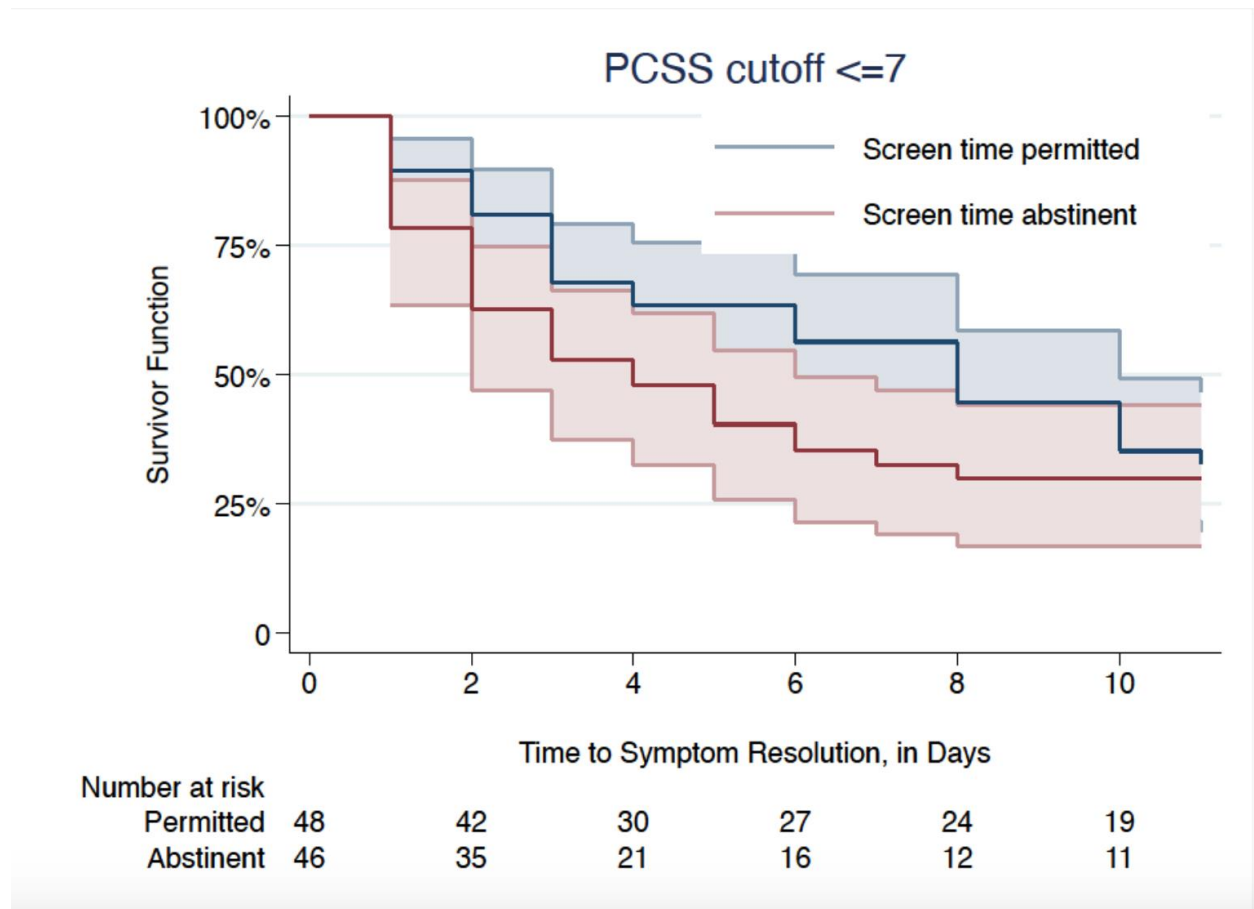

Shadows represent 95% CIs.
