# Supplementary material
Source: PubMed Central journal article supplement (PMC8424526)
Supplement: jamapediatr-e212782-s003.pdf [file jamapediatr-e212782-s003.pdf]

## Data Sharing Statement

Macnow. Effect of Screen Time on Recovery From Concussion. *JAMA Pediatr*. Published September 07, 2021.  
doi:10.1001/jamapediatrics.2021.2782

### Data

**Data available:** No

### Additional Information

**Explanation for why data not available:** We did not obtain patient consent to widely share the data nor was it included in the IRB protocol.
